# Supplementary material for: Fast, quantitative and high resolution mapping of viscoelastic properties with bimodal AFM
Source: Royal Society of Chemistry journal article supplement (doi:10.1039/c9nr04396a), 2019-01-01
Supplement: c9nr04396a1.pdf [file c9nr04396a1.pdf]

## Electronic Supplementary Information

# Fast, quantitative and high resolution mapping of viscoelastic properties with bimodal AFM

Simone Benaglia, Carlos A. Amo and Ricardo Garcia\*

Instituto de Ciencia de Materiales de Madrid, CSIC

c/ Sor Juana Ines de la Cruz 3

28049 Madrid, Spain

Email address: [r.garcia@csic.es](mailto:r.garcia@csic.es)

## Derivation of Equations 12-14

The virial for the  $i$ -th mode is calculated by

$$V_i = f_i \int_0^{1/f_i} F_{ts}(z_c + z(t)) z_i(t) dt \quad (S1)$$

where the cantilever's deflection is given by

$$z(t) = z_0 + z_1(t) + z_2(t) \quad (S2)$$

For an elastic interaction and in the absence of long-range forces, the above integral is calculated in the time interval  $[t_a, t_b]$  for which  $z_c + z(t) \leq 0$ . By assuming that  $z_0$  and  $A_2$  are negligible with respect to  $A_1$ , then the virial of the first mode is given by

$$V_1 = f_1 \int_{t_a}^{t_b} F_{ts}(z_c + z(t)) z_1(t) dt \quad (S3)$$

From  $t_a$  to  $t_b$ , the force increases from zero to its peak force value at  $t=t^*$  and then it decreases to zero at  $t=t_b$ . Then, if the contact area is kept constant during approach and retraction

$$V_1 = f_1 \int_{t_a}^{t_b} F_{ts}(z_c + z(t)) z_1(t) dt = 2f_1 \int_{t_a}^{t^*} F_{ts}(z_c + z(t)) z_1(t) dt \quad (S4)$$

The above integral can be performed in the  $z$  domain by using the following change of variables

$$u = A_1 \cos(\omega_1 t + \varphi_1) \quad (S5)$$

with

$$du = -A_1 \omega_1 \sin(\omega_1 t + \varphi_1) dt = -\omega_1 \sqrt{A_1^2 - u^2} dt \quad (S6)$$

then

$$V_1 = \frac{-2}{\omega_1} f_1 \int_{z_c}^{A_1} F_{ts}(z_c + u) \frac{u}{\sqrt{A_1^2 - u^2}} du \quad (S7)$$

The indentation can be expressed in terms of the instantaneous deflection as

$$\delta(z) = \begin{cases} 0, & z_1 < z \\ u - z_c, & z_1 \geq z_c \end{cases} \quad (S8)$$

for  $u=A_1$  we reach the maximum indentation (deformation)

$$\delta_{max} = A_1 - z_c \quad (S9)$$

The above definitions and the fact that the force is only non-zero when  $\delta \neq 0$ , enable to express  $V_1$  as

$$V_1 = \frac{1}{\pi} \int_0^{\delta_{max}} F_{ts}(\delta) \frac{\delta + z_c}{\sqrt{A_1^2 - (\delta + z_c)^2}} d\delta \quad (\text{S10})$$

Now, we introduce the following definitions

$$F_{ts}(\delta) = v \quad (\text{S11})$$

$$\frac{dF_{ts}}{d\delta} d\delta = k_{ts}(\delta) d\delta = dv \quad (\text{S12})$$

$$dw = \frac{\delta + z_c}{\sqrt{A_1^2 - (\delta + z_c)^2}} d\delta \quad (\text{S13})$$

which implies that

$$w = - \frac{(\delta + z_c + A_1)(-\delta - z_c + A_1)}{\sqrt{A_1^2 - (\delta + z_c)^2}} = \sqrt{A_1^2 - (\delta + z_c)^2} \quad (\text{S14})$$

By applying the integration by parts relationship  $\int u dv = uv - \int v du$ ,  $V_1$  becomes

$$V_1 = \frac{1}{\pi} \left( F(\delta) \sqrt{A_1^2 - (\delta + z_c)^2} \right)_0^{\delta_{max}} - \frac{1}{\pi} \int_0^{\delta_{max}} k_{ts}(\delta) \sqrt{A_1^2 - (\delta + z_c)^2} d\delta \quad (\text{S15})$$

The first term is equal to 0 for both extremes of the integration because  $F(\delta)=0$  when  $\delta=0$ , and  $A_1 - z_c \sqrt{A_1^2 - (\delta + z_c)^2} = 0$  for  $\delta=\delta_{max}$

which leads to

$$V_1 = - \frac{1}{\pi} \int_0^{\delta_{max}} k_{ts}(\delta) \sqrt{A_1^2 - (\delta + z_c)^2} d\delta \quad (\text{S16})$$

Now we can use the definition of the maximum indentation (equation S9) to replace  $z_c$  in the above equations,

$$\sqrt{A_1^2 - (\delta + z_c)^2} = \sqrt{A_1^2 - (\delta + A - \delta_{max})^2} = A_1 \sqrt{1 - \left(1 - \frac{\delta_{max} - \delta}{A_1}\right)^2} \quad (\text{S17})$$

when the deformation is small respect to the amplitude  $A_1$ ,

$$x = \frac{\delta_{max} - \delta}{A_1} \ll 1 \quad (\text{S18})$$

we can apply series expansion

$$\sqrt{1 - (1 - x)^2} \approx \sqrt{2x} - \frac{1}{4}\sqrt{2x^3} - \frac{1}{32}\sqrt{2x^5} \dots \quad (\text{S19})$$

By keeping the first term, an approximation that is valid with the amplitudes and deformations used in bimodal AFM, Eq. S17 becomes

$$A_1 \sqrt{1 - \left(1 - \frac{\delta_{max} - \delta}{A_1}\right)^2} \approx \sqrt{2A_1} \sqrt{\delta_{max} - \delta} \quad (\text{S20})$$

Then equation S16 becomes

$$V_1 \approx -\frac{1}{\pi} \int_0^{\delta_{max}} k_{ts}(\delta) \sqrt{2A_1} \sqrt{\delta_{max} - \delta} d\delta \quad (\text{S21})$$

which corresponds to equation 12 (main text).

Now we proceed to calculate virial of the second mode. From equations 4 and 7 (main text) we get,

$$V_2 = -\frac{k_2 A_2^2 \Delta f_2}{f_{02}} = (A_2^2 / 4\pi) \int_0^{1/f_1} F_{ts}'(t) dt \quad (\text{S22})$$

$$\frac{\Delta f_2}{f_{02}} \approx -\frac{1}{4\pi k_2} \int_0^{1/f_1} k_{ts}(t) dt \quad (\text{S23})$$

It is more convenient to perform the integral in  $z$  domain. To that purpose we use the definitions given in equations S4 and S5,

$$\frac{\Delta f_2}{f_{02}} \approx \frac{1}{4\pi k_2} 2 \int_{z_c}^{A_1} k_{ts}(u) \frac{du}{\sqrt{A_1^2 - u^2}} \quad (\text{S24})$$

which in terms of the indentation ( $\delta = u - z_c$ )

$$\frac{\Delta f_2}{f_{02}} \approx \frac{1}{2\pi k_2} \int_0^{\delta_{max}} k_{ts}(\delta) \frac{d\delta}{\sqrt{A_1^2 - (\delta + z_c)^2}} \quad (\text{S25})$$

Then equation S22 becomes

$$V_2 \approx -\frac{A_2^2}{2\pi} \int_0^{\delta_{max}} k_{ts}(\delta) \frac{d\delta}{\sqrt{A_1^2 - (\delta + z_c)^2}} \quad (\text{S26})$$

by using equation S20

$$V_2 \approx -\frac{A_2^{2\delta_{max}}}{2\pi} \int_0^{\delta_{max}} k_{ts}(\delta) \frac{d\delta}{\sqrt{2A_1} \sqrt{\delta_{max} - \delta}} \quad (\text{S27})$$

This step finalizes the deduction of equation 13 (main text).

Now we proceed to derive equation 14 (main text). We start from the definition of the energy dissipation (equation 5)

$$E_{diss} = - \int_0^{1/f_i} F_{ts}(t) \dot{z}_i(t) dt \quad (\text{S28})$$

we define a dissipative force as

$$F_{dis} = \Lambda(z) \dot{z}(t) \quad (\text{S29})$$

where  $\Lambda(z)$  is a dissipation function.

by using the definition of  $u$  (equations S5 and S6),

$$dt = \frac{du}{-\omega_1 \sqrt{A_1^2 - u^2}} \quad (\text{S29})$$

Then the energy dissipated for the first mode:

$$\begin{aligned} E_{dis1} &= \int_{-A_1}^{A_1} \Lambda(z_c + u) \left( -\omega_1 \sqrt{A_1^2 - u^2} \right)^2 \frac{du}{-\omega_1 \sqrt{A_1^2 - u^2}} = \\ &= - \int_{-A_1}^{A_1} \Lambda(z_c + u) \omega_1 \sqrt{A_1^2 - u^2} du \end{aligned} \quad (\text{S31})$$

by using

$$\sqrt{A_1^2 - u^2} = \int \frac{-u}{\sqrt{A_1^2 - u^2}} du \quad (\text{S32})$$

and the definitions

$$v = \sqrt{A_1^2 - u^2}; \quad dv = \frac{-u}{\sqrt{A_1^2 - u^2}} du \quad (\text{S33})$$

$$dw = \Lambda(z_c + u) du; \quad w = M(u) = \int du \Lambda(z_c + u) \quad (\text{S34})$$

we apply the integration by parts formula

$$\int_{-A}^A \Lambda(z_c + u) \sqrt{A_1^2 - u^2} du_1 = \sqrt{A_1^2 - u^2} M(u) - \int_{-A_1}^{A_1} M(u) \frac{-u}{\sqrt{A_1^2 - u^2}} du \quad (S35)$$

The first term is zero, then the energy dissipated by mode 1 is

$$E_{dis1} = -\omega_1 \int_{-A_1}^{A_1} \Lambda(z_c + u) \sqrt{A_1^2 - u_1^2} du_1 = \omega_1 \int_{-A_1}^{A_1} M(u) \frac{u}{\sqrt{A_1^2 - u^2}} du \quad (S36)$$

, which resembles equation S10, then by analogy we deduce

$$E_{dis1} = 2 \int_0^{\delta_{max}} g_{int}(\delta) \sqrt{2A_1} \sqrt{\delta_{max} - \delta} d\delta \quad (S37)$$

where  $g_{int}$  is the dissipative equivalent of  $k_{int}$  in a conservative interaction force.

## Calibration of bimodal AM-FM

The value of the Young's modulus given by bimodal AM-FM has been determined with a calibrated polystyrene sample of Young's modulus = 2.7 GPa (Bruker Test Sample). For completeness we provide the viscosity coefficient, the loss tangent and the retardation time.

**Figure S1.** (a) Young's modulus, (b) viscous coefficient, (c) loss tangent and (d) retardation time on a PS sample of nominal elastic modulus value of 2.7 GPa. The Young's modulus has been calculated considering a  $\nu_s=0.34$ . (e) The extracted nanomechanical values are shown. The measurement parameters are  $A_{01} = 81$  nm,  $A_1 = 65$  nm,  $f_{01} = 68.070$  kHz,  $k_1 = 2.77$  N m<sup>-1</sup>,  $Q_1 = 208$ ,  $A_2 = 1.2$  nm,  $f_{02} = 432.333$  kHz,  $k_2 = 142$  N m<sup>-1</sup>,  $R = 12$  nm.

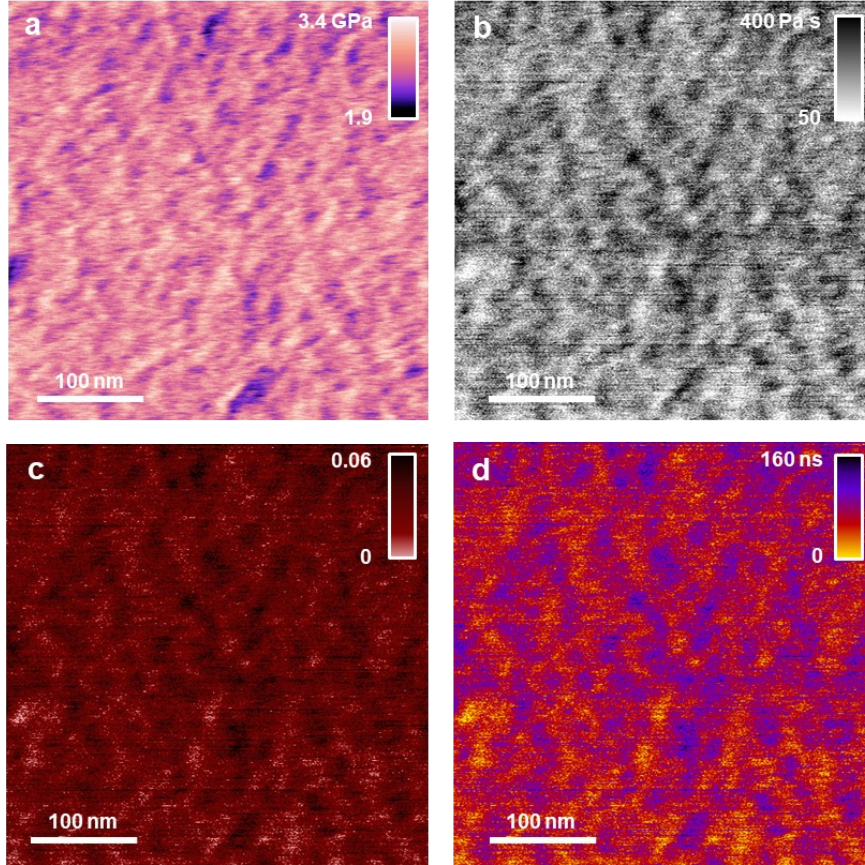

| $E$ (GPa)       | $\tan \rho$       | $\tau$ ( $\mu$ s) | $\eta_{\text{com}}$ (Pa s) |
|-----------------|-------------------|-------------------|----------------------------|
| $2.75 \pm 0.16$ | $0.028 \pm 0.009$ | $0.06 \pm 0.02$   | $204 \pm 73$               |

### Energy dissipation map of a LDPE sample

**Figure S2.** Energy dissipation map of the 1<sup>st</sup> mode on LDPE. The map was acquired simultaneously with the data shown in Fig. 4.

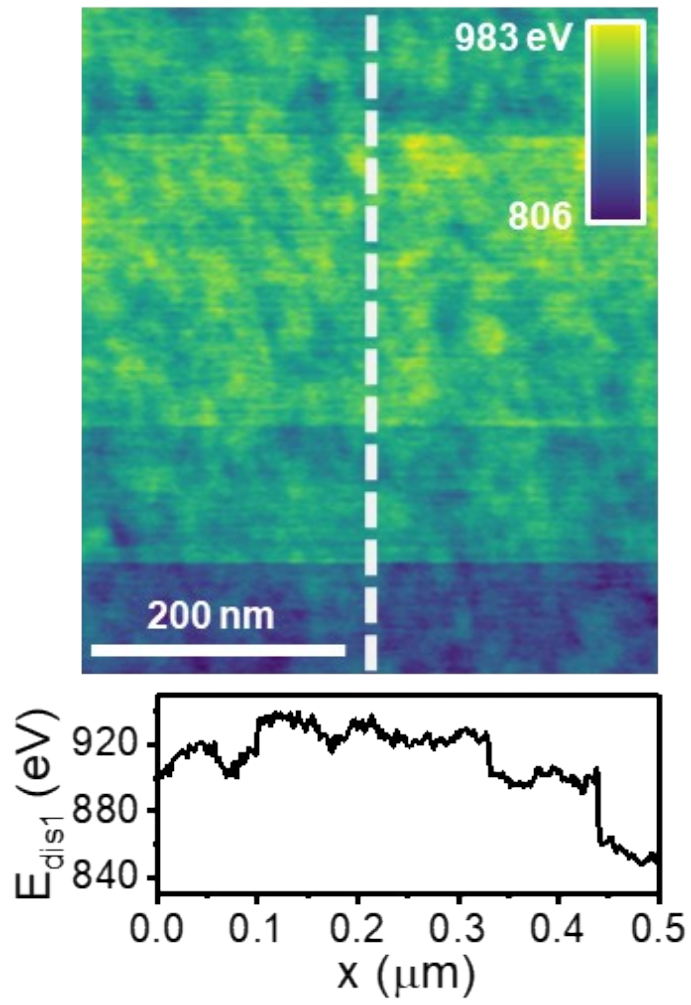

## Influence of the humidity on the bimodal AFM data

Nanomechanical parameters extracted from two bimodal AM-FM experiments performed on a PS-b-PMMA sample with humid air (RH=22%) and in a dry N<sub>2</sub> atmosphere (RH<3 %).

**Table S1.** PS-b-PMMA viscoelastic properties at two relative humidity.

| Measurement condition | PS-b-PMMA block | $E_{\text{eff}}$ (GPa) | $\tan \rho$     | $\tau$ ( $\mu\text{s}$ ) | $\eta_{\text{eff}}$ (Pa s) |
|-----------------------|-----------------|------------------------|-----------------|--------------------------|----------------------------|
| Air                   | PS              | $2.1 \pm 0.25$         | $0.11 \pm 0.02$ | $0.22 \pm 0.03$          | $460 \pm 65$               |
|                       | PMMA            | $2.6 \pm 0.30$         | $0.07 \pm 0.02$ | $0.15 \pm 0.03$          | $350 \pm 65$               |
| N <sub>2</sub> flow   | PS              | $2.1 \pm 0.2$          | $0.09 \pm 0.03$ | $0.19 \pm 0.06$          | $423 \pm 130$              |
|                       | PMMA            | $2.6 \pm 0.2$          | $0.03 \pm 0.02$ | $0.07 \pm 0.05$          | $200 \pm 120$              |
